# Supplementary material for: Acute Effects of Whole-Body Electromyostimulation on Energy Expenditure at Resting and during Uphill Walking in Healthy Young Men
Source: MDPI journal article supplement (doi:10.3390/metabo12090781), 2022-08-24
Supplement: s1 [file s1]

## Supplementary material

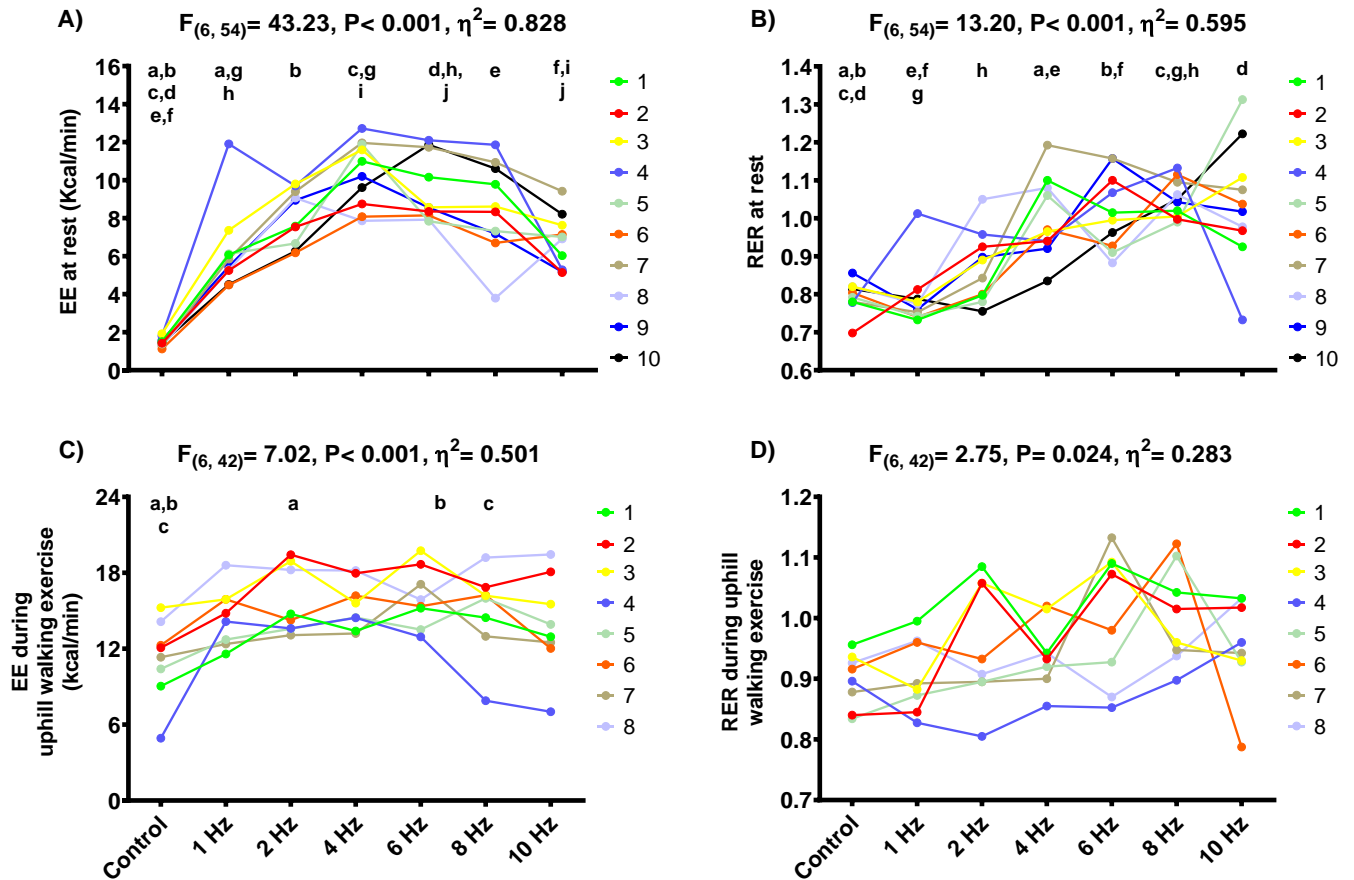

**Figure S1.** Individual values of energy expenditure (EE) and respiratory exchange ratio (RER) at rest (n=10) and during uphill walking (n=8) when applying different frequencies of whole-body electromyostimulation. *p*-values from repeated measures analysis of variance (ANOVA). Similar letters represent differences between experimental conditions as determined by post-hoc Bonferroni analysis. Crow data are presented as mean of 4 minutes in each frequency

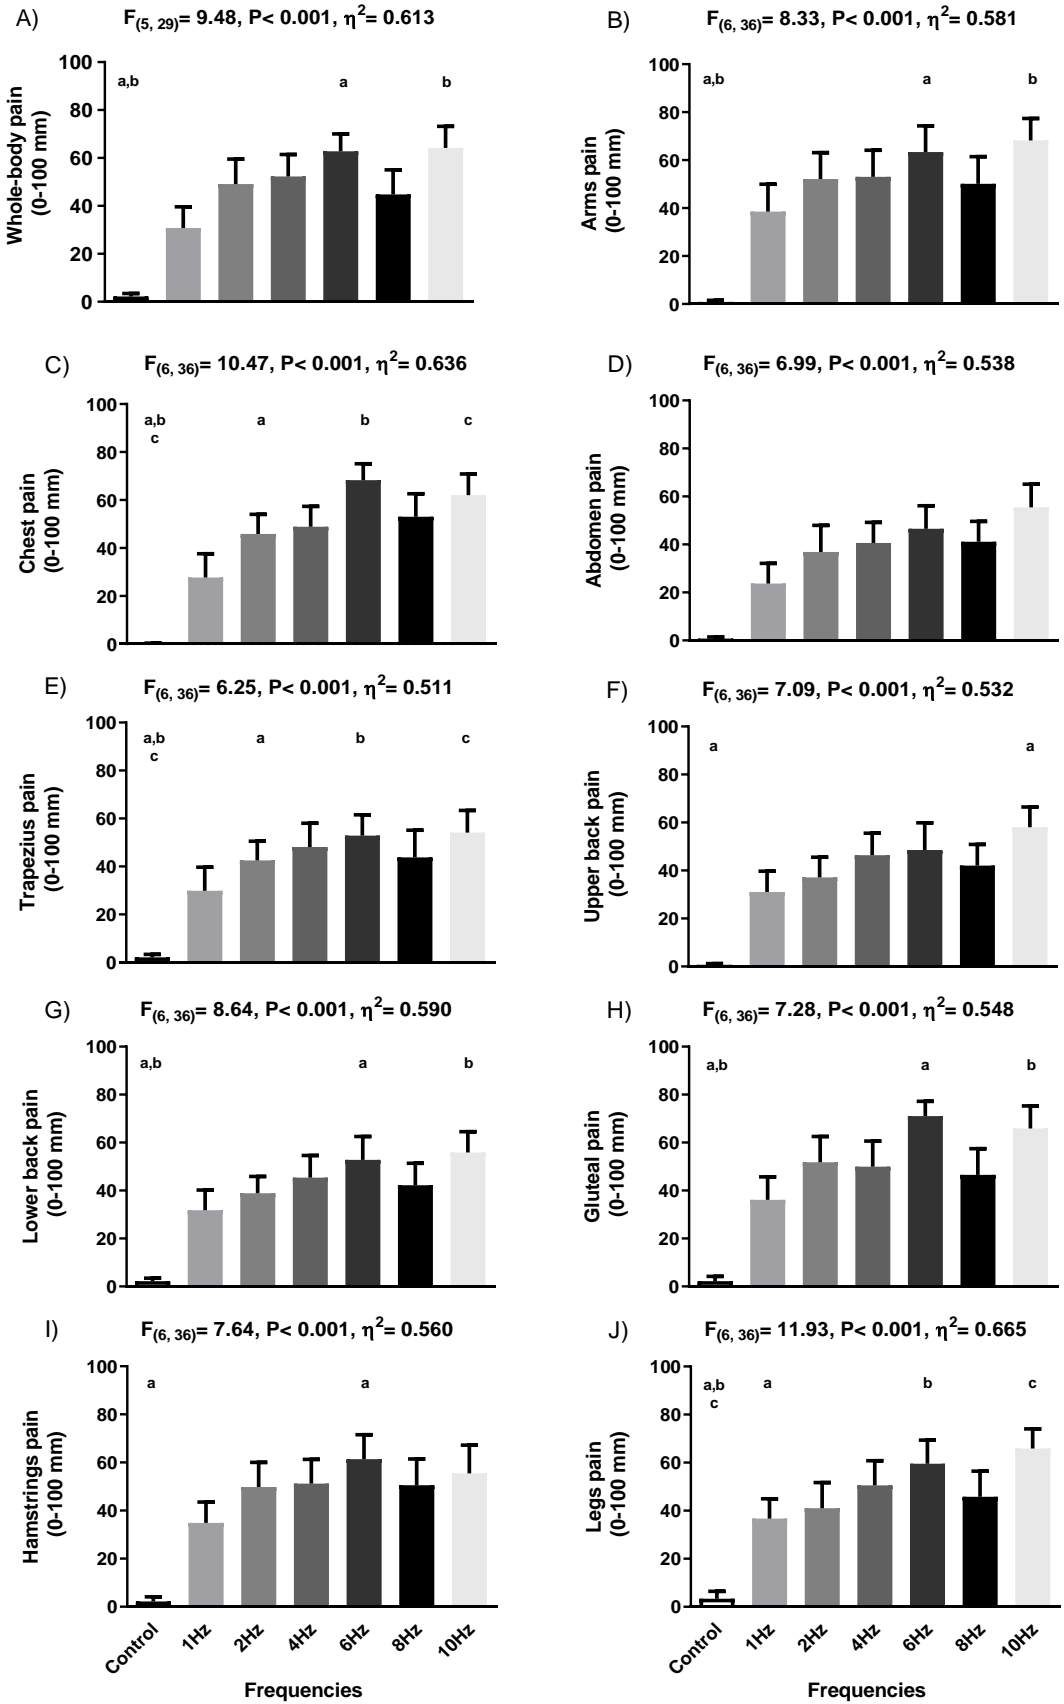

**Figure S2.** Pain perception in different anatomic locations after applying whole-body electromyostimulation at different frequencies at rest (n=7). Visual analogue scales (VAS) ranges from 0 to 100, being 0 "no pain", and 100 "the maximum tolerable pain". *p*-values from repeated measures analysis of variance (ANOVA). Similar letters represent differences between experimental conditions as determined by post-hoc Bonferroni analysis. Data are presented as mean and standard error of the mean (SEM).

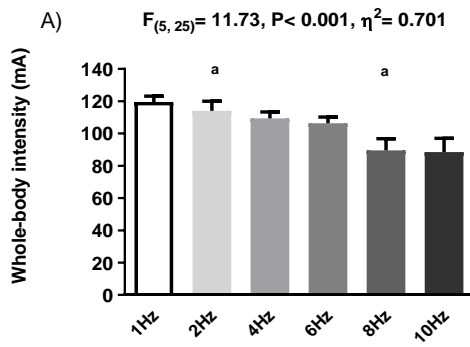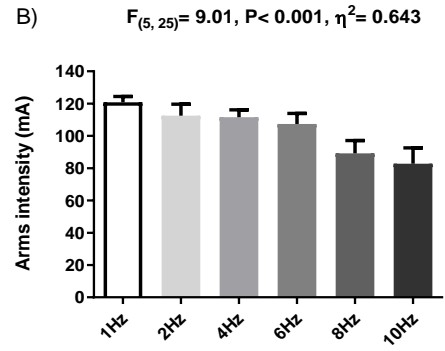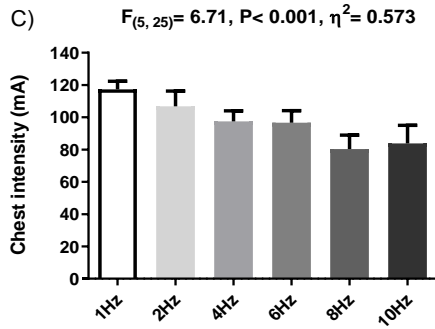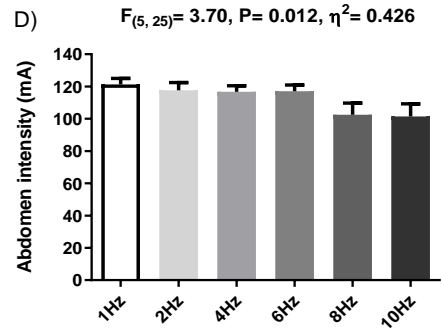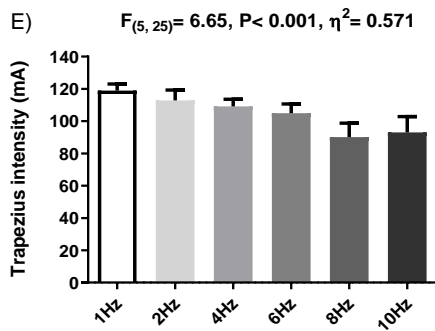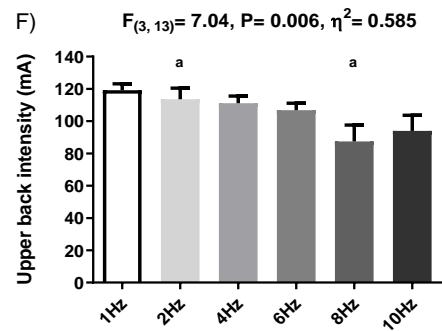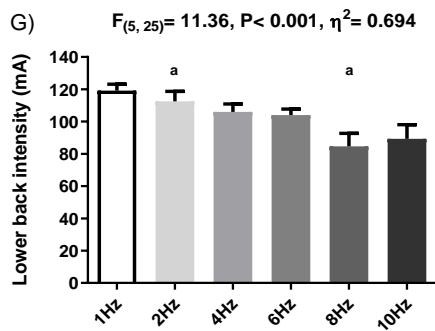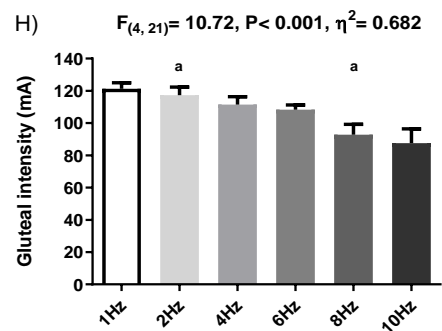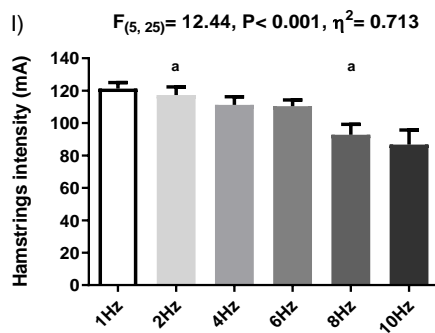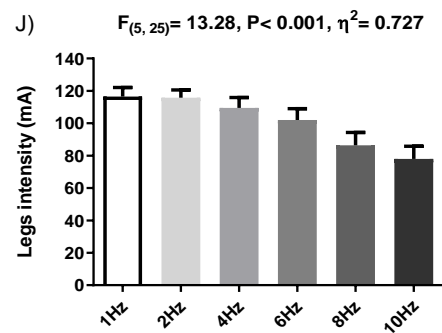

Frequencies

Frequencies

**Figure S3.** Impulse intensity at rest (n=6) applying whole-body electromyostimulation with different frequencies. Impulse intensity ranges from 0 mA to 125 mA, being 0 mA "no intensity", and 125 mA "all intensity possible". *p*-values from repeated measures analysis of variance (ANOVA). Similar letters represent differences between experimental conditions as determined by post-hoc Bonferroni analysis. Data are presented as mean and standard error of the mean (SEM).

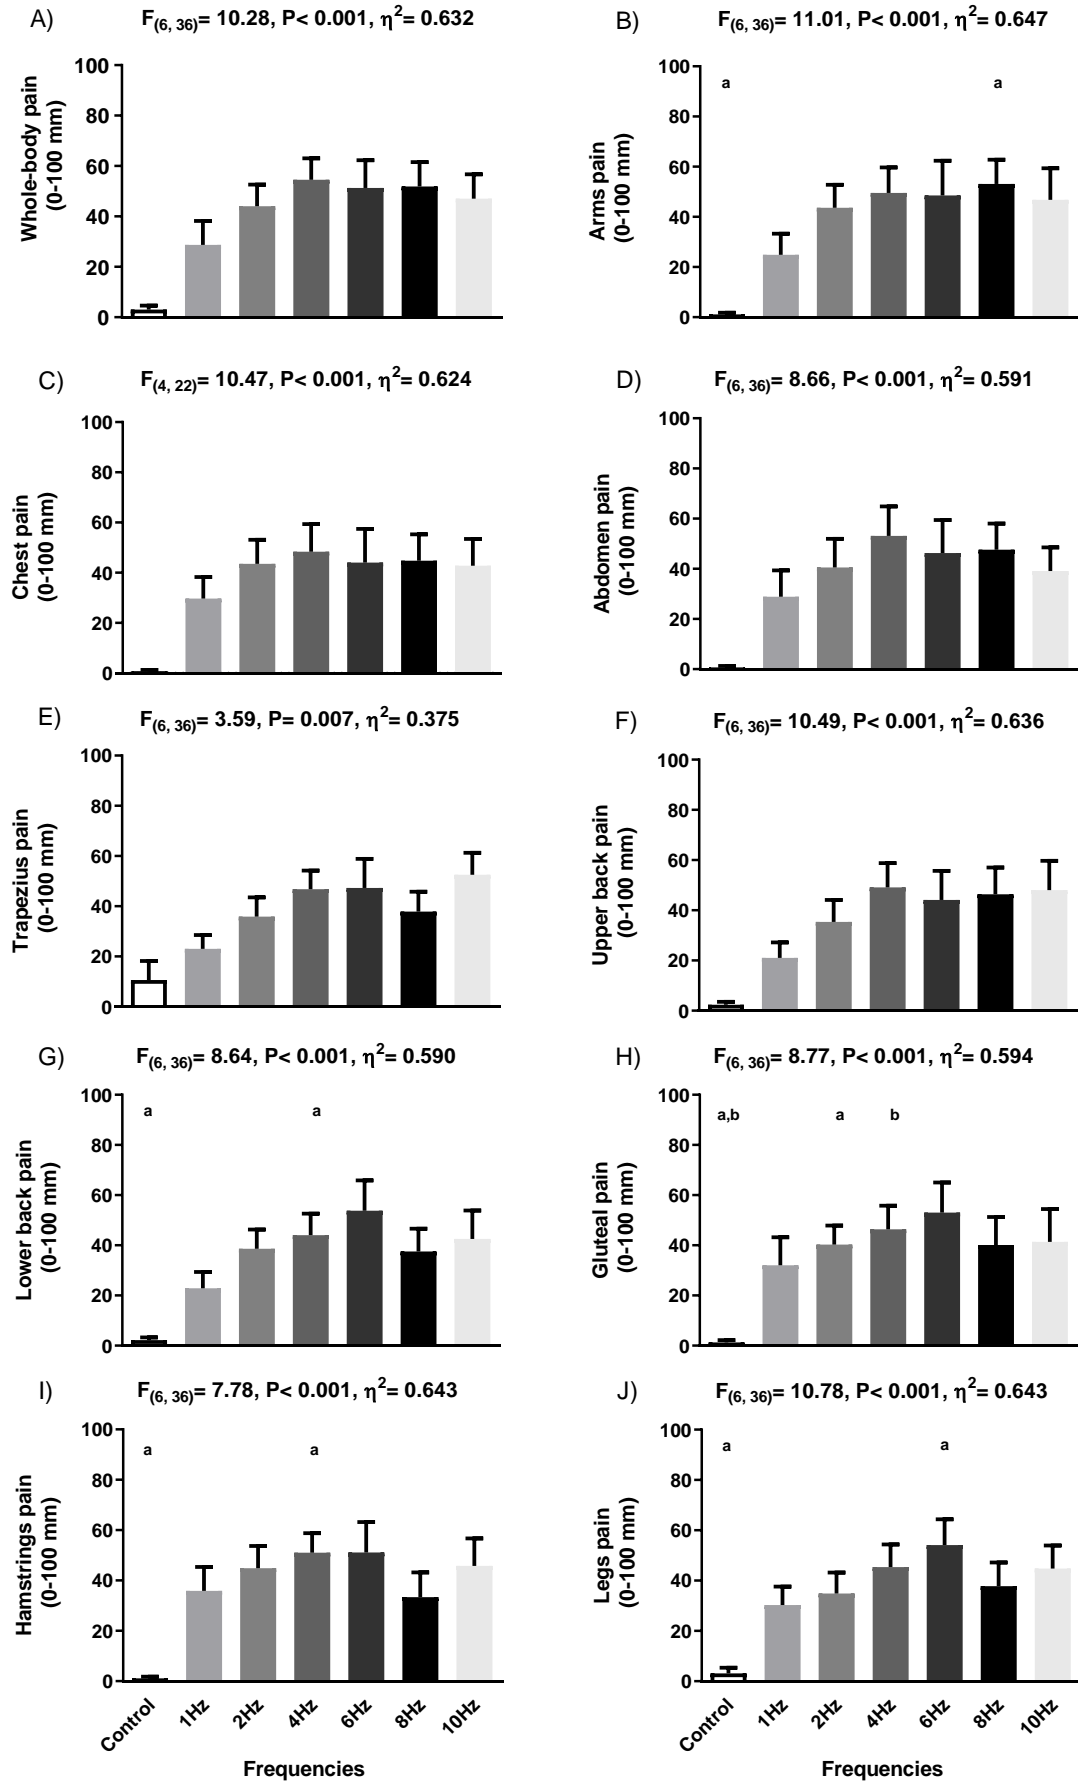

**Figure S4.** Pain perception in different anatomic locations after applying whole-body electromyostimulation at different frequencies during uphill walking (n=7). Visual analogue scales (VAS) ranges from 0 to 100, being 0 "no pain", and 100 "the maximum tolerable pain". *p*-values from repeated measures analysis of variance (ANOVA). Similar letters represent differences between experimental conditions as determined by post-hoc Bonferroni analysis. Data are presented as mean and standard error of the mean (SEM).

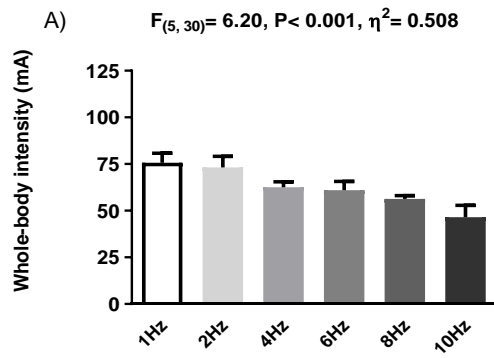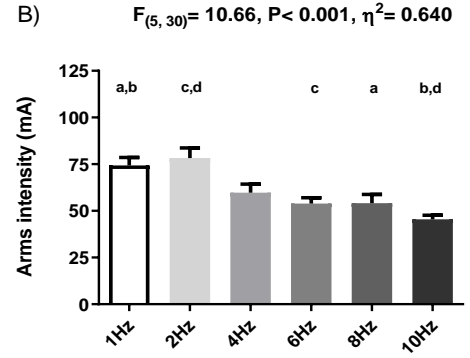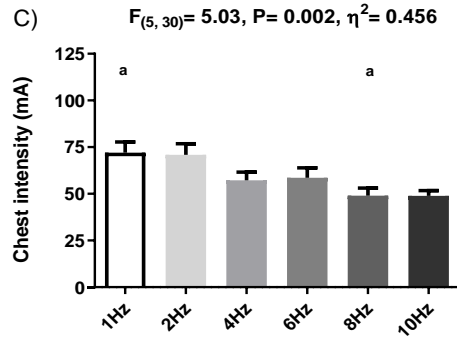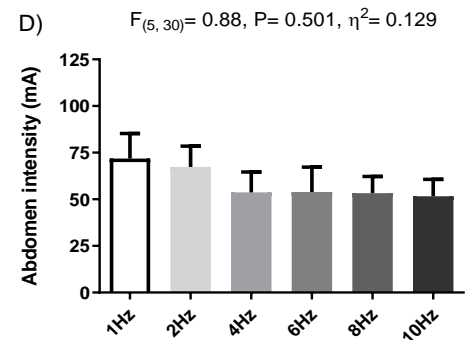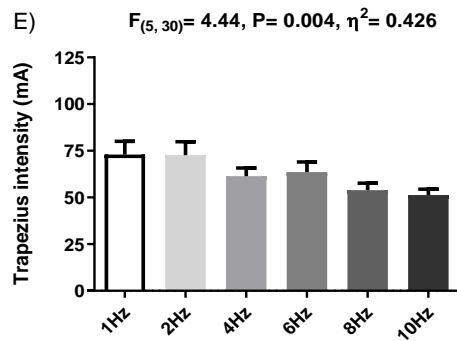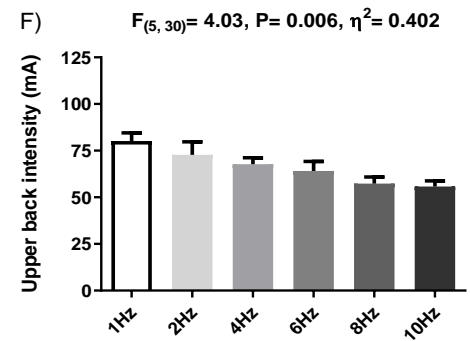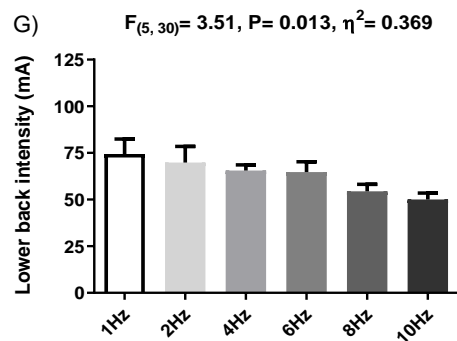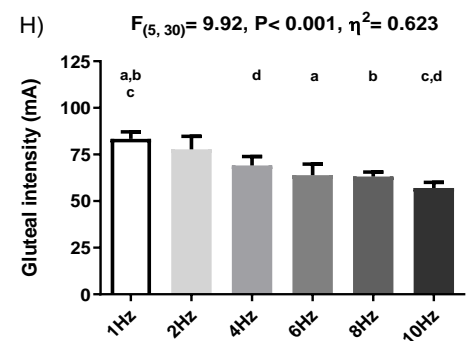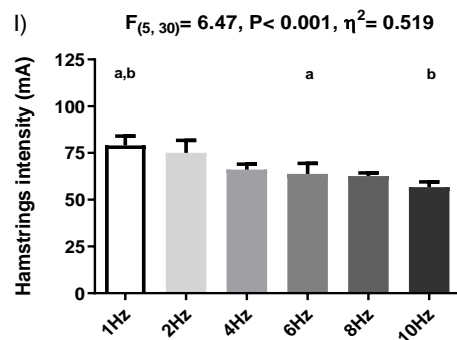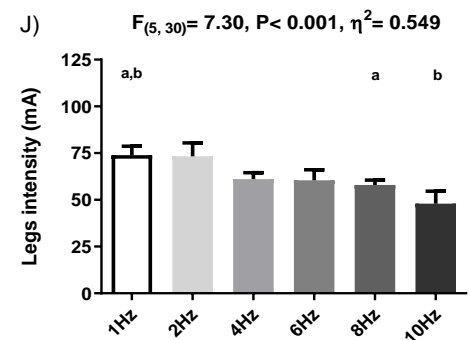

Frequencies

Frequencies



**Figure S5.** Impulse intensity during uphill walking (n=7) applying whole-body electromyostimulation with different frequencies. Impulse intensity ranges from 0 mA to 125 mA, being 0 mA "no intensity", and 125 mA "all intensity possible". *p*-values from repeated measures analysis of variance (ANOVA). Similar letters represent differences between experimental conditions as determined by post-hoc Bonferroni analysis. Data are presented as mean and standard error of the mean (SEM).

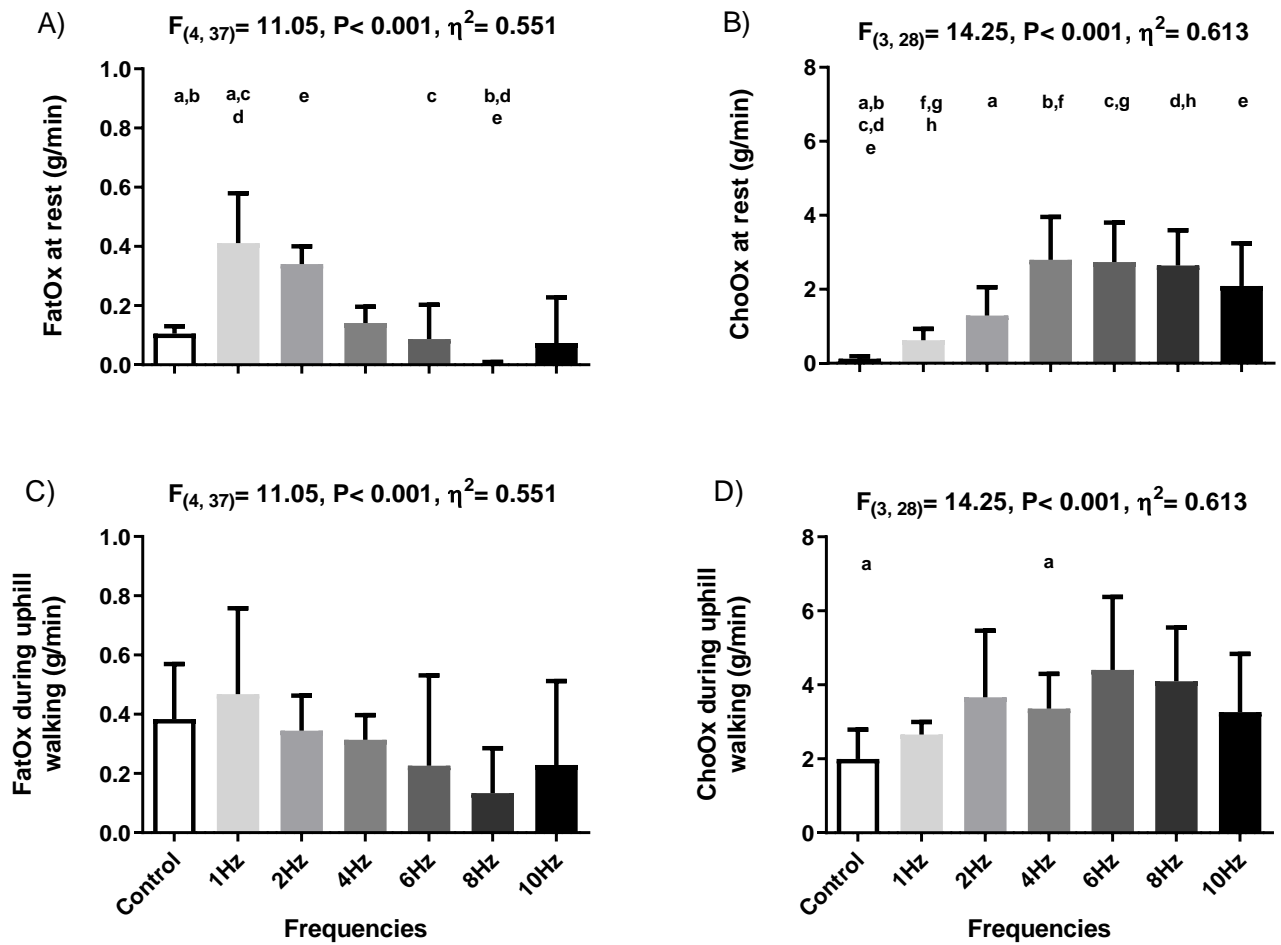

**Figure S6.** Fat oxidation (FatOx) and carbohydrate oxidation (ChoOx) at rest ( $n=10$ ) and during uphill walking ( $n=8$ ) when applying different frequencies of whole-body electromyostimulation.  $P$ -values from repeated measures analysis of variance (ANOVA). Similar letters represent differences between experimental conditions as determined by post-hoc Bonferroni analysis. Data are presented as mean and standard error of the mean (SEM).
